# Supplementary material
Source: PubMed Central journal article supplement (PMC2907899)
Supplement: NIHMS215349-supplement-01.pdf [file NIHMS215349-supplement-01.pdf]

**Table S1:** Real-time PCR analysis of AroA, ER $\beta$ a and ER $\beta$ b mRNAs in NBH and SC larvae after estrogen treatment (15 – 18 dpf)(Expt 3). Individual killifish larvae from the two sites were exposed to vehicle alone (0.001% DMSO) or one of a range of E2 concentrations (0.001 - 0.3  $\mu$ M; n = 6 per treatment condition) (see legend to Fig. 3). Data for each mRNA species were analyzed separately by two-way ANOVA for effects of dose and site. No significant effects of E2 were observed (p >0.05); therefore, all E2 dosage groups from a given site were combined and reanalyzed by two-way ANOVA. No statistically significant differences between sites or treatments were identified (p >0.05). Values shown are  $\beta$ -actin normalized mRNA levels  $\pm$  SEM (controls, n = 6; E2, n = 36).

|                | <b>AroA x 10<sup>3</sup></b>      |                 | <b>ER<math>\beta</math>a x 10<sup>4</sup></b> |                 | <b>ER<math>\beta</math>b x 10<sup>2</sup></b> |                 |
|----------------|-----------------------------------|-----------------|-----------------------------------------------|-----------------|-----------------------------------------------|-----------------|
|                | <b>SC</b>                         | <b>NBH</b>      | <b>SC</b>                                     | <b>NBH</b>      | <b>SC</b>                                     | <b>NBH</b>      |
| <b>Control</b> | <b>2.14 <math>\pm</math> 0.60</b> | 1.85 $\pm$ 0.59 | 0.97 $\pm$ 0.44                               | 1.08 $\pm$ 0.64 | 2.25 $\pm$ 0.60                               | 2.91 $\pm$ 0.30 |
| <b>E2</b>      | 2.38 $\pm$ 0.17                   | 1.79 $\pm$ 0.14 | 1.14 $\pm$ 0.15                               | 0.96 $\pm$ 0.08 | 2.91 $\pm$ 0.11                               | 2.56 $\pm$ 0.11 |
